# Supplementary material
Source: publisher figshare collection journal article supplement (https://diabetesjournals.figshare.com/articles/dataset/_/27854487)
Supplement: Supplementary file 2 [file 1]

## KEY RESOURCES TABLE

| REAGENT or RESOURCE                                                                                                                                   | SOURCE                          | IDENTIFIER           |
|-------------------------------------------------------------------------------------------------------------------------------------------------------|---------------------------------|----------------------|
| <b>Organ Donor</b>                                                                                                                                    |                                 |                      |
| HPAP-126 (Figure 4F)                                                                                                                                  | Human Pancreas Analysis Program | RRID:SAMN30486796    |
| Islets (Figure 4A-E)                                                                                                                                  | IIDP                            | RRID: SAMN41789873   |
| <b>Animals</b>                                                                                                                                        |                                 |                      |
| NSG                                                                                                                                                   | The Jackson Laboratory          | RRID:IMSR_JAX:005557 |
| <b>CRISPR reagents</b>                                                                                                                                |                                 |                      |
| Alt-R S.p. Cas9 D10A Nickase V3                                                                                                                       | IDT                             | CAT# 1081062         |
| Alt-R CRISPR-Cas9 tracrRNA, 20 nmol                                                                                                                   | IDT                             | CAT# 1072533         |
| Alt-R CRISPR-Cas9 crRNA, 2 nmol<br>(5'- TTCGGTCCCCAGAGTCGCTG -3')                                                                                     | IDT                             | N/A; Custom          |
| Alt-R CRISPR-Cas9 crRNA, 2 nmol<br>(5'- CTTAACATCCTGAGCACTCT -3')                                                                                     | IDT                             | N/A; Custom          |
| 5'-<br>ATTCCCCCAGGACCCTCAGTGA CTTCC<br>CTCCCTAATACCGCCCGCAGCGACTCT<br>GGGGACTGAAGGCAGATCCTTAACATC<br>CTGAGCACTCTGGGCCTTCGACCCTCT<br>GTCGCCGACTGCG -3' | IDT                             | N/A; Custom          |
| <b>Primers and TaqMan probes</b>                                                                                                                      |                                 |                      |
| Gck_F7: 5' –<br>GGCATTGTCATCCTCACGAC – 3'                                                                                                             | IDT                             | N/A; Custom          |
| Gck_R7 5' –<br>CCAGGGAGAATCAAGCAGGA – 3'                                                                                                              | IDT                             | N/A; Custom          |
| TaqMan probe ANU644V                                                                                                                                  | Thermo Fisher Scientific        | CAT# 4332075         |
| <b>Glucose monitoring, hormone detection and insulin</b>                                                                                              |                                 |                      |
| AlphtaTRAK2 automatic glucometer                                                                                                                      | Zortis                          | N/A                  |

|                                       |                          |                                                                                     |
|---------------------------------------|--------------------------|-------------------------------------------------------------------------------------|
| AlphaTRAK2 test strips                | Zortis                   | N/A                                                                                 |
| Human insulin ELISA kit (Figure 5)    | Mercodia                 | CAT# 10-1132-01                                                                     |
| Human insulin ELISA kit (Figure 4)    | Crystal Chem             | CAT# 90095                                                                          |
| Mouse insulin ELISA kit               | Crystal Chem             | CAT# 90080                                                                          |
| Mouse glucagon ELISA kit              | Crystal Chem             | CAT# 81518                                                                          |
| Lantus Insulin U100                   | Midwest Vet Supply       | CAT# 191.49250.3                                                                    |
| <b>Software</b>                       |                          |                                                                                     |
| GraphPad Prism (v9.4.1)               | GraphPad Software        | <a href="https://www.graphpad.com/">https://www.graphpad.com/</a> ; RRID:SCR_002798 |
| Fiji                                  | Schindelin et al., 2012  | <a href="https://imagej.net/Fiji/">https://imagej.net/Fiji/</a> ; RRID:SCR_002285   |
| Ilastik 1.3.3                         | Stuart et al., 2019      | <a href="https://www.ilastik.org/">https://www.ilastik.org/</a> ; RRID:SCR_015246   |
| Cellprofiler 3.1.9                    | Carpenter et al., 2006   | <a href="https://cellprofiler.org/">https://cellprofiler.org/</a> ; RRID:SCR_007358 |
| <b>Antibodies</b>                     |                          |                                                                                     |
| Rabbit anti-insulin                   | Proteintech              | CAT# 15848-1-AP; RRID:AB_10597100                                                   |
| Mouse anti-glucagon                   | Santa Cruz Biotechnology | CAT# sc-514592; RRID:AB_2629431                                                     |
| <b>IMC Antibodies</b>                 |                          |                                                                                     |
| 141Pr-HLA-ABC (Clone EMR8-5)          | BD Biosciences           | Cat#565292                                                                          |
| 142Nd-CD57 (Clone HCD57)              | Fluidigm                 | Cat#3142007B                                                                        |
| 143Nd-CD31 (Clone C31.3+C31.7+C31.10) | LifeSpan BioSciences     | Cat#LS-C390863-100                                                                  |
| 144Nd- <b>CD14</b> (Clone EPR3653)    | Fluidigm                 | Cat#3144025D                                                                        |
| 145Nd-C- <b>peptide</b> (Clone 3A1)   | Thermo                   | Cat#MA1-22710; RRID: AB_558517                                                      |
| 146Nd-Nestin (Clone 196908)           | Fluidigm                 | Cat#3146015B                                                                        |

|                                           |             |                                    |
|-------------------------------------------|-------------|------------------------------------|
| 147Sm-Glucagon (Clone C-11)               | Santa Cruz  | Cat#sc-514592; RRID: AB_2629431    |
| 148Nd-Pan-Keratin (Clone C11)             | Fluidigm    | Cat#3148020D                       |
| 149Sm-CD11b (Clone EPR1344)               | Fluidigm    | Cat#3149028D                       |
| 150Nd-CD44 (Clone IM7)                    | Fluidigm    | Cat#3150018B                       |
| 151Eu-PDX1                                | R&D systems | Cat#AF2419; RRID: AB_355257        |
| 152Sm-CD45 (Clone 2B11)                   | Fluidigm    | Cat#3152016D                       |
| 153Eu-CD56                                | Proteintech | Cat#14255-1-AP; RRID: AB_2149421   |
| 154Sm-Beta-actin (Clone 2F1-1)            | Fluidigm    | Cat#3154021D                       |
| 155Gd-FoxP3 (Clone 236A/E7)               | Fluidigm    | Cat#3155016D                       |
| 156Gd-CD4 (Clone EPR6855)                 | Fluidigm    | Cat#3156033D                       |
| 158Gd-NKX6.1                              | Sigma       | Cat#HPA036774; RRID: AB_10673664   |
| 159Tb-CD68 (Clone KP1)                    | Fluidigm    | Cat#3159035D                       |
| 160Gd-Somatostatin (G-10)                 | Santa Cruz  | Cat#sc-13099; RRID: AB_2195930     |
| 161Dy-CD20 (Clone H1)                     | Fluidigm    | Cat#3161029D                       |
| 162Dy-CD8 (Clone C8/144B)                 | Fluidigm    | Cat#3162034D                       |
| 164Dy-CD99                                | R&D systems | Cat#AF3968; RRID: AB_2076301       |
| 165Ho-CA2                                 | Rockland    | Cat#200-401-136S; RRID: AB_2612117 |
| 166Er-NF- $\kappa$ B (Clone K10895.12.50) | Fluidigm    | Cat#3166006A                       |
| 167Er-Granzyme B (Clone EPR20129-217)     | Fluidigm    | Cat#3167021D                       |
| 168Er-Ki67 (Clone B56)                    | Fluidigm    | Cat#3168022D                       |
| 169Tm-Collagen Type 1                     | Fluidigm    | Cat#3169023D                       |
| 170Er-CD3                                 | Fluidigm    | Cat#3170019D                       |
| 171Yb-p16 (Clone 2D9A12)                  | Abcam       | Cat#ab54210                        |

|                                                 |                          |                                |
|-------------------------------------------------|--------------------------|--------------------------------|
| 172Yb-pS6 (Clone N7-548)                        | Fluidigm                 | Cat#3172008A                   |
| 173Yb-CD45RO (UCHL1)                            | Fluidigm                 | Cat#3173016D                   |
| 174Yb-HLA-DR (Clone TAL 1B5)                    | Abcam                    | Cat#ab20181; RRID: AB_445401   |
| 175Lu-Pancreatic Polypeptide                    | Abcam                    | Cat#ab77192; RRID: AB_1524152  |
| 176Yb-Ghrelin                                   | Santa Cruz               | Cat#sc-10368; RRID: AB_2232479 |
| 1X Trace Element B                              | BD Biosciences           | Cat# 25-022-CI                 |
| Penicillin-Streptomycin                         | Thermo Fisher Scientific | Cat# 15140122                  |
| <b>SC-islet maintenance and differentiation</b> |                          |                                |
| ROCK Inhibitor Y-27632                          | Stem Cell Technologies   | Cat# 72307                     |
| mTeSR1                                          | Stem Cell Technologies   | Cat# 85850                     |
| DMEM/F12                                        | VWR                      | Cat# 45000-346                 |
| MCDB 131                                        | Thermo Fisher Scientific | Cat# 10372-019                 |
| Bovine Serum Albumin (BSA) Fraction V           | Life Technologies        | Cat# 15260-037                 |
| Matrigel                                        | BD Biosciences           | Cat# 356231                    |
| Nonessential Amino Acids (100x)                 | Thermo Fisher Scientific | Cat# 00-4555-56                |
| Accutase                                        | Thermo Fisher Scientific | Cat# 00-4555-56                |
| Recombinant Mouse Wnt3A                         | R&D Systems              | Cat# 1324-WN/CF                |
| Activin A                                       | R&D Systems              | Cat# 338-AC/CF                 |
| ALK5 inhibitor II (ALK5i II)                    | Enzo Life Sciences       | Cat# ALX-270-445               |
|                                                 | Cayman Chemicals         | Cat# 14794                     |
| L-Ascorbic Acid (Vitamin C)                     | Sigma-Aldrich            | Cat# A4544                     |
| BSA                                             | Proliant                 | Cat# 68700                     |
| CHIR99021                                       | SelleckChem              | Cat# S294                      |
| $\gamma$ -secretase inhibitor XX                | Calbiochem,              | Cat# 565789                    |

|                                                    |                          |                |
|----------------------------------------------------|--------------------------|----------------|
| D-Glucose                                          | Thermo Fisher Scientific | Cat# D161      |
| GlutaMAX                                           | Thermo Fisher Scientific | Cat# 35050061  |
| Heparin                                            | Sigma-Aldrich            | Cat# H3149     |
| Insulin-Transferrin-Selenium- Ethanolamine (ITS-X) | Thermo Fisher Scientific | Cat# 51500056  |
| Recombinant KGF/FGF-7                              | R&D Systems              | Cat# 251-KG/CF |
| LDN193189                                          | Stemgent                 | Cat# 04-0074   |
| N-Acetyl-L-cysteine                                | Sigma-Aldrich            | Cat# A9165     |
| Retinoic Acid (RA)                                 | Sigma-Aldrich            | Cat# R2625     |
| SANT-1                                             | Sigma-Aldrich            | Cat# S4572     |
| Sodium bicarbonate (NaHCO <sub>3</sub> )           | Sigma-Aldrich            | Cat# S6297     |
| 3,3',5-Triiodo-L-thyronine sodium salt (T3)        | Sigma-Aldrich            | Cat# T6397     |
| TPB                                                | Calbiochem               | Cat# 565740    |
| Zinc sulfate heptahydrate (ZnSO <sub>4</sub> )     | Sigma-Aldrich            | Cat# Z0251     |
| MEM nonessential amino acid                        | Thermo Fisher Scientific | Cat# 11140076  |
| 1X Trace Element A                                 | BD Biosciences           | Cat# 25-021-CI |
| 1X Trace Element B                                 | BD Biosciences           | Cat# 25-022-CI |
| Penicillin-Streptomycin                            | Thermo Fisher Scientific | Cat# 15140122  |
